# Supplementary material for: The Genetic Variants in the Renin-Angiotensin System and the Risk of Heart Failure in Polish Patients
Source: MDPI journal article supplement (doi:10.3390/genes13071257), 2022-07-15
Supplement: s1 [file s1]

# The Genetic Variants in the Renin-Angiotensin System and the Risk of Heart Failure in Polish Patients

Iwona Gorący <sup>1</sup>, Anna Gorący <sup>1</sup>, Mariusz Kaczmarczyk <sup>1</sup>, Jakub Rosik <sup>1,2</sup>, Klaudyna Lewandowska <sup>1</sup> and Andrzej Ciechanowicz <sup>1,\*</sup>

**Supplementary Table S1.** Association of the A(-6)G *AGT*, I/D *ACE* and A1166C *AGTR1* polymorphisms with heart failure in NYHA class I-II patients in regard to codominant, dominant, recessive or overdominant model of inheritance.

| Gene | Genotypes          | HF patients | Controls         | OR (95% CI)      | p*    |
|------|--------------------|-------------|------------------|------------------|-------|
| AGT  | Codominant model   |             |                  |                  |       |
|      | AA                 | 43 (16.0)   | 37 (29.6)        | 1                | 0.010 |
|      | AG                 | 146 (54.5)  | 55 (44.0)        | 4.07 (1.63-10.5) |       |
|      | GG                 | 79 (29.5)   | 33 (26.4)        | 2.91 (1.12-7.78) |       |
|      | Dominant model     |             |                  |                  |       |
|      | AA                 | 43 (16.0)   | 37 (29.6)        | 1                | 0.004 |
|      | AG+GG              | 225 (84.0)  | 88 (70.4)        | 3.53 (1.51-8.50) |       |
|      | Recessive model    |             |                  |                  |       |
|      | AA+AG              | 189 (70.5)  | 92 (73.6)        | 1                | 0.846 |
|      | GG                 | 79 (29.5)   | 33 (26.4)        | 1.07 (0.53-2.19) |       |
|      | Overdominant model |             |                  |                  |       |
|      | AA+GG              | 122 (45.5)  | 70 (56.0)        | 1                | 0.036 |
| AG   | 146 (54.5)         | 55 (44.0)   | 2.05 (1.05-4.13) |                  |       |
| ACE  | Codominant model   |             |                  |                  |       |
|      | II                 | 73 (27.2)   | 36 (23.7)        | 1                | 0.141 |
|      | ID                 | 129 (48.1)  | 81 (53.3)        | 0.49 (0.21-1.10) |       |
|      | DD                 | 66 (24.6)   | 35 (23.0)        | 0.41 (0.15-1.07) |       |
|      | Dominant model     |             |                  |                  |       |
|      | II                 | 73 (27.2)   | 36 (23.7)        | 1                | 0.053 |
|      | ID+DD              | 195 (72.8)  | 116 (76.3)       | 0.46 (0.20-1.01) |       |
|      | Recessive model    |             |                  |                  |       |
|      | II+ID              | 202 (75.4)  | 117 (77.0)       | 1                | 0.332 |
|      | DD                 | 66 (24.6)   | 35 (23.0)        | 0.69 (0.32-1.46) |       |
|      | Overdominant model |             |                  |                  |       |
|      | II+DD              | 139 (51.9)  | 71 (46.7)        | 1                | 0.428 |
| ID   | 129 (48.1)         | 81 (53.3)   | 0.77 (0.40-1.47) |                  |       |
|      | Codominant model   |             |                  |                  |       |
|      | AA                 | 149 (55.6)  | 80 (52.6)        | 1                | 0.021 |
|      | AC                 | 99 (36.9)   | 61 (40.1)        | 0.40 (0.19-0.80) |       |
|      | CC                 | 20 (7.5)    | 11 (7.2)         | 1.31 (0.34-5.14) |       |
|      | Dominant model     |             |                  |                  |       |
|      | AA                 | 149 (55.6)  | 80 (52.6)        | 1                | 0.027 |

|              |                    |            |            |                  |       |
|--------------|--------------------|------------|------------|------------------|-------|
| <i>AGTR1</i> | AC+CC              | 119 (44.4) | 72 (47.4)  | 0.48 (0.24-0.92) |       |
|              | Recessive model    |            |            |                  |       |
|              | AA+AC              | 248 (92.5) | 141 (92.8) | 1                | 0.336 |
|              | CC                 | 20 (7.5)   | 11 (7.2)   | 1.89 (0.52-7.06) |       |
|              | Overdominant model |            |            |                  |       |
|              | AA+CC              | 169 (63.1) | 91 (59.9)  | 1                | 0.006 |
|              | AC                 | 99 (36.9)  | 61 (40.1)  | 0.38 (0.19-0.76) |       |

\*Statistical significance tested by the likelihood ratio test, adjusted for age, sex, BMI, smoking, diabetes mellitus and hypertension.

**Supplementary Table S2.** Pairwise gene variants interactions and the risk of HF of NYHA class I/II assuming different models.

| rs 1         | rs 2         | Model OR (95% CI), p* |              |             |             |             |             |
|--------------|--------------|-----------------------|--------------|-------------|-------------|-------------|-------------|
|              |              | DOM                   | REC          | HOM1-HET    | HOM2-HET    | HET-HOM1    | HET-HOM2    |
| <i>ACE</i>   | <i>AGTRI</i> | 0.41                  | 1.21         | DD-AC 0.49  | II-AC 1.49  | ID-CC 3.60  | ID-AA 1.66  |
|              |              | (0.20-0.82)           | (0.12-12.50) | (0.15-1.67) | (0.44-5.22) | (0.59-2.28) | (0.78-3.64) |
|              |              | 0.011                 | 0.867        | 0.250       | 0.526       | 0.168       | 0.192       |
| <i>ACE</i>   | <i>AGT</i>   | 1.30                  | 0.77         | DD-AG 1.03  | II-AG 2.22  | ID-GG 0.74  | ID-AA 0.14  |
|              |              | (0.65-2.58)           | (0.23-2.75)  | (0.38-2.92) | (0.70-7.90) | (0.31-1.82) | (0.04-0.51) |
|              |              | 0.458                 | 0.684        | 0.949       | 0.171       | 0.509       | 0.003       |
| <i>AGTRI</i> | <i>AGT</i>   | 0.89                  | 8.58         | CC-AG 6.48  | AA-AG 2.82  | AC-GG 0.76  | AC-AA 0.21  |
|              |              | (0.45-1.75)           | (0.23-728.8) | (1.10-4.44) | (1.32-6.26) | (0.31-1.90) | (0.05-0.85) |
|              |              | 0.732                 | 0.320        | 0.039       | 0.007       | 0.552       | 0.030       |

\*FDR-adjusted p values for each pair of gene variants separately

**Supplementary Table S3.** Association of the A(-6)G *AGT*, I/D *ACE* and A1166C *AGTR1* polymorphisms with heart failure in NYHA class III-IV patients in regard to codominant, dominant, recessive or overdominant model of inheritance.

| Gene         | Genotypes          | HF patients | Controls   | OR (95% CI)      | p*    |
|--------------|--------------------|-------------|------------|------------------|-------|
| <i>AGT</i>   | Codominant model   |             |            |                  |       |
|              | AA                 | 37 (25.0)   | 37 (29.6)  | 1                | 0.227 |
|              | AG                 | 74 (50.0)   | 55 (44.0)  | 2.07 (0.80-5.56) |       |
|              | GG                 | 37 (25.0)   | 33 (26.4)  | 1.10 (0.38-3.22) |       |
|              | Dominant model     |             |            |                  |       |
|              | AA                 | 37 (25.0)   | 37 (29.6)  | 1                | 0.275 |
|              | AG+GG              | 111 (75.0)  | 88 (70.4)  | 1.64 (0.68-4.04) |       |
|              | Recessive model    |             |            |                  |       |
|              | AA+AG              | 111 (75.0)  | 92 (73.6)  | 1                | 0.396 |
|              | GG                 | 37 (25.0)   | 33 (26.4)  | 0.69 (0.29-1.63) |       |
| <i>ACE</i>   | Overdominant model |             |            |                  |       |
|              | AA+GG              | 74 (50.0)   | 70 (56.0)  | 1                | 0.087 |
|              | AG                 | 74 (50.0)   | 55 (44.0)  | 1.97 (0.91-4.42) |       |
|              | Codominant model   |             |            |                  |       |
|              | II                 | 24 (16.2)   | 36 (23.7)  | 1                | 0.565 |
|              | ID                 | 84 (56.8)   | 81 (53.3)  | 0.66 (0.22-1.91) |       |
|              | DD                 | 40 (27.0)   | 35 (23.0)  | 0.52 (0.15-1.73) |       |
|              | Dominant model     |             |            |                  |       |
|              | II                 | 24 (16.2)   | 36 (23.7)  | 1                | 0.349 |
|              | ID+DD              | 124 (83.8)  | 116 (76.3) | 0.61 (0.22-1.72) |       |
| <i>AGTR1</i> | Recessive model    |             |            |                  |       |
|              | II+ID              | 108 (73.0)  | 117 (77.0) | 1                | 0.462 |
|              | DD                 | 40 (27.0)   | 35 (23.0)  | 0.72 (0.30-1.71) |       |
|              | Overdominant model |             |            |                  |       |
|              | II+DD              | 64 (43.2)   | 71 (46.7)  | 1                | 0.966 |
|              | ID                 | 84 (56.8)   | 81 (53.3)  | 0.98 (0.45-2.12) |       |
|              | Codominant model   |             |            |                  |       |
|              | AA                 | 77 (52.0)   | 80 (52.6)  | 1                | 0.329 |
|              | AC                 | 62 (41.9)   | 61 (40.1)  | 0.55 (0.24-1.21) |       |
|              | CC                 | 9 (6.1)     | 11 (7.2)   | 0.76 (0.16-3.68) |       |
| <i>AGTR1</i> | Dominant model     |             |            |                  |       |
|              | AA                 | 77 (52.0)   | 80 (52.6)  | 1                | 0.152 |
|              | AC+CC              | 71 (48.0)   | 72 (47.4)  | 0.57 (0.26-1.23) |       |
|              | Recessive model    |             |            |                  |       |
|              | AA+AC              | 139 (93.9)  | 141 (92.8) | 1                | 0.982 |
|              | CC                 | 9 (6.1)     | 11 (7.2)   | 1.02 (0.23-4.64) |       |
| <i>AGTR1</i> | Overdominant model |             |            |                  |       |
|              | AA+CC              | 86 (58.1)   | 91 (59.9)  | 1                | 0.146 |
|              | AC                 | 62 (41.9)   | 61 (40.1)  | 0.57 (0.26-1.22) |       |

\*Statistical significance tested by the likelihood ratio test, adjusted for age, sex, BMI, smoking, diabetes mellitus and hypertension.

**Supplementary Table S4.** Pairwise gene variants interactions and the risk of HF of NYHA class III/IV assuming different models.

| rs 1         | rs 2         | Model OR (95% CI), p* |                |              |              |              |             |
|--------------|--------------|-----------------------|----------------|--------------|--------------|--------------|-------------|
|              |              | DOM                   | REC            | HOM1-HET     | HOM2-HET     | HET-HOM1     | HET-HOM2    |
| <i>ACE</i>   | <i>AGTRI</i> | 0.41                  | 1.00           | DD-AC 0.91   | II-AC 3.22   | ID-CC 1.35   | ID-AA 2.85  |
|              |              | (0.18-0.91)           | (0.09-13.79)   | (0.25-3.38)  | (0.76-13.13) | (0.20-11.95) | (1.18-7.29) |
|              |              | 0.023                 | 0.997          | 0.890        | 0.110        | 0.770        | 0.020       |
| <i>ACE</i>   | <i>AGT</i>   | 1.13                  | 0.34           | DD-AG 1.24   | II-AG 1.71   | ID-GG 0.71   | ID-AA 0.61  |
|              |              | (0.51-2.49)           | (0.08-1.69)    | (0.41-3.87)  | (0.35-7.82)  | (0.25-2.00)  | (0.19-1.93) |
|              |              | 0.762                 | 0.184          | 0.702        | 0.499        | 0.513        | 0.396       |
| <i>AGTRI</i> | <i>AGT</i>   | 0.89                  | 11.19          | CC-AG 2.60   | AA-AG 1.83   | AC-GG 0.36   | AC-AA 0.60  |
|              |              | (0.40-1.95)           | (0.16-1271.52) | (0.33-26.23) | (0.73-4.66)  | (0.11-1.12)  | (0.15-2.55) |
|              |              | 0.769                 | 0.336          | 0.377        | 0.198        | 0.077        | 0.488       |

\*FDR-adjusted p values for each pair of gene variants separately
